# Supplementary material for: Enhancing the Treatment of Uncontrolled Inflammation through the Targeted Delivery of TPCA-1-Loaded Nanoparticles
Source: MDPI journal article supplement (doi:10.3390/pharmaceutics15102435), 2023-10-09
Supplement: s1 [file s1]

## Supplementary Materials: Treatment of Uncontrolled Inflammation through Targeted Delivery of TPCA-1-Loaded Nanoparticles

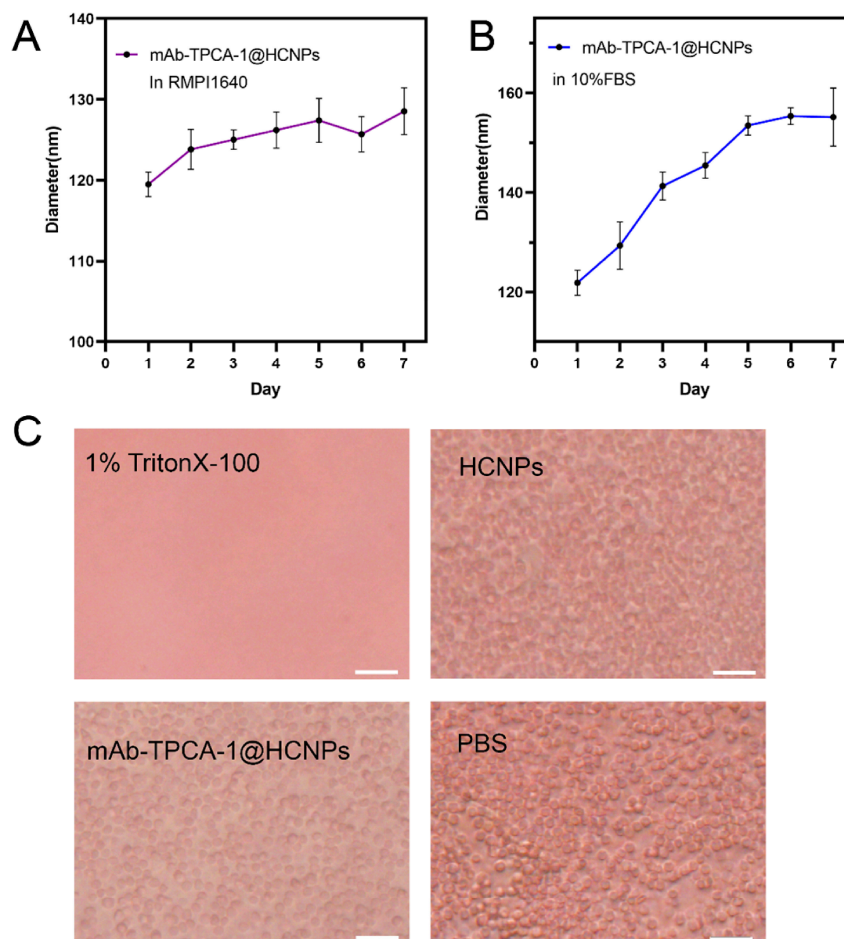

**Figure S1.** The size of mAb-TPCA-1@HCNPs in RPMI 1640 (A) and 10% FBS (B) during one week of storage at 4°C. (C) Representative microscopy images of erythrocytes with different treatments: 1% Triton X-100, HCNPs (500 µg/ml), mAb-TPCA-1@HCNPs (500 µg/ml) and PBS. The scale bar is 50 µm.

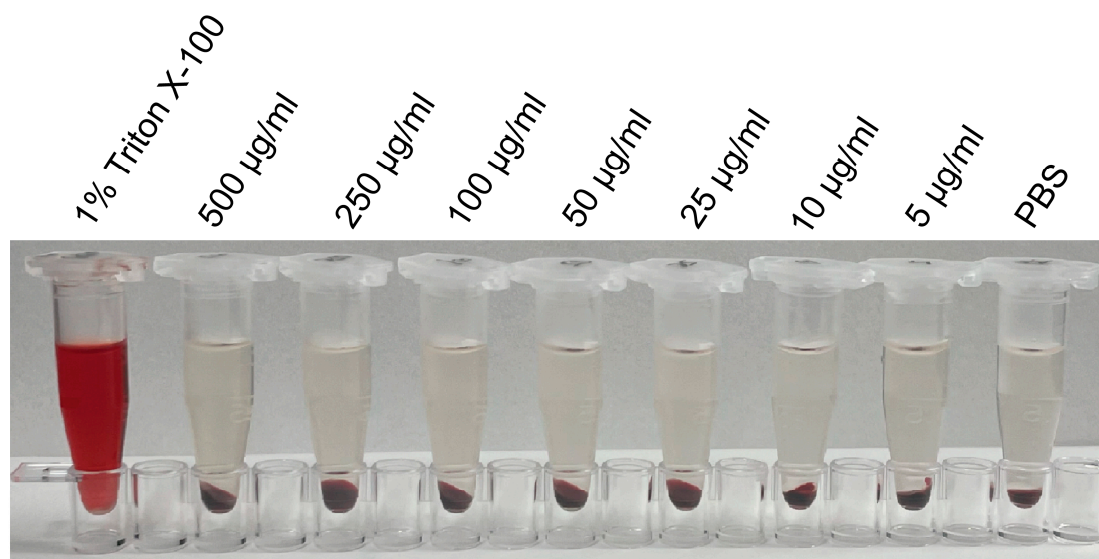

**Figure S2.** The photograph of Eppendorf tubes containing red blood cells treated with mAb-TPCA-1@HCNPs at different concentrations.

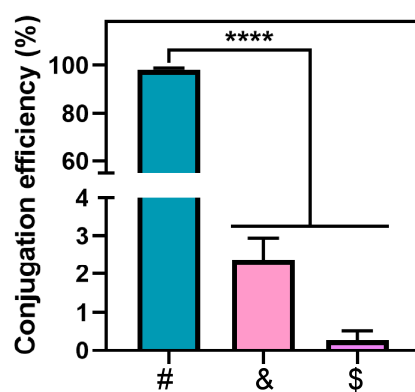

**Figure S3.** The quantitative analysis of the conjugation efficiency of mAbs to the TPCA-1-loaded NPs detected by nano-flow cytometry. Groups #, & and \$ represent mAb-TPCA-1@HCNPs, TPCA-1@HCNPs and Blank NPs, respectively.

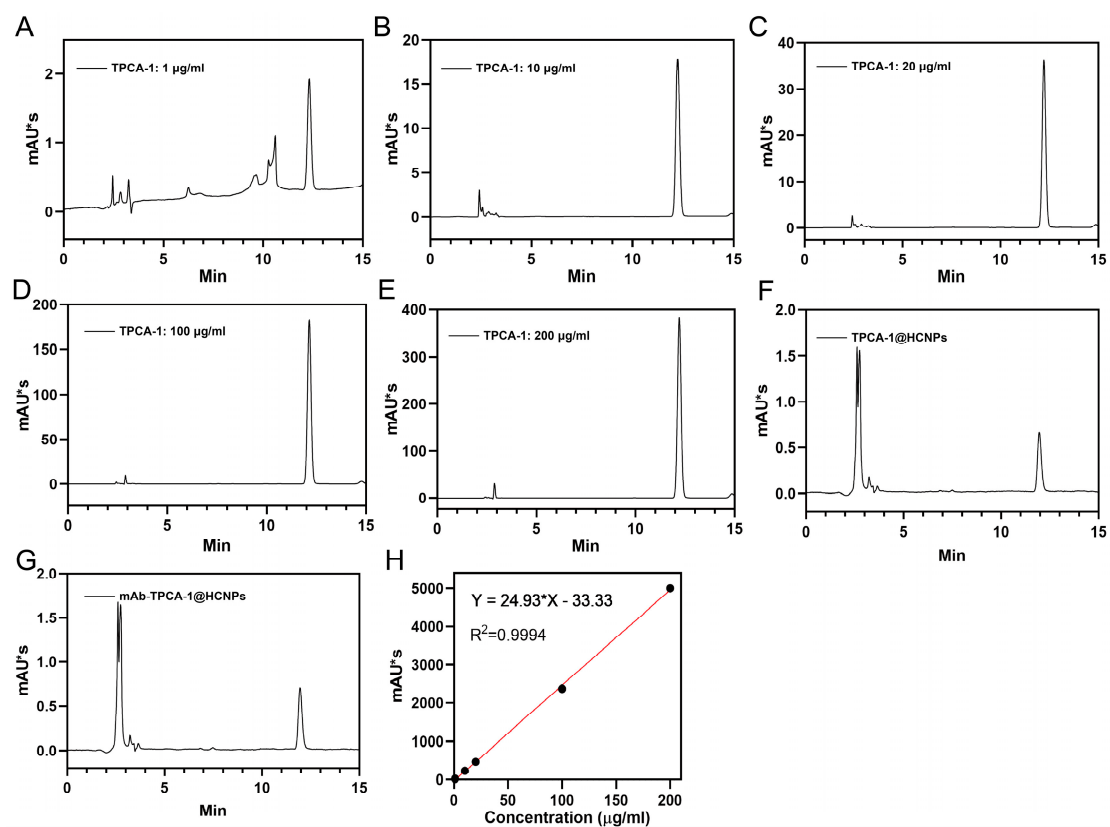

**Figure S4.** The HPLC result of free TPCA-1 at various concentration (A~E) and that released from TPCA-1@HCNPs (F) and mAb-TPCA-1@HCNPs (G) at 270 nm. The standard curve of TPCA-1 determined by HPLC (H).

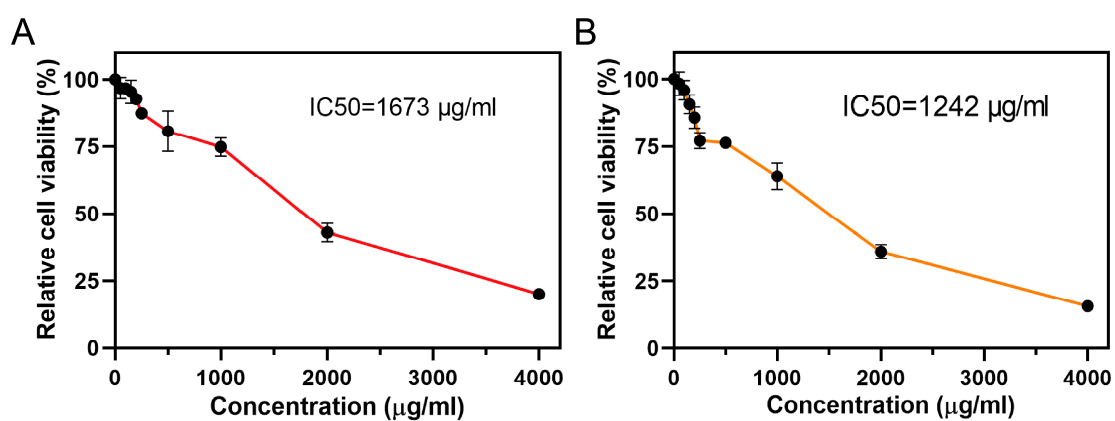

**Figure S5.** Cell cytotoxicity evaluation of HUVECs (A) and RAW264.7 cells (B) indicated by broken line graph, and the  $IC_{50}$  was  $1673 \mu\text{g/ml}$  and  $1242 \mu\text{g/ml}$ , respectively.

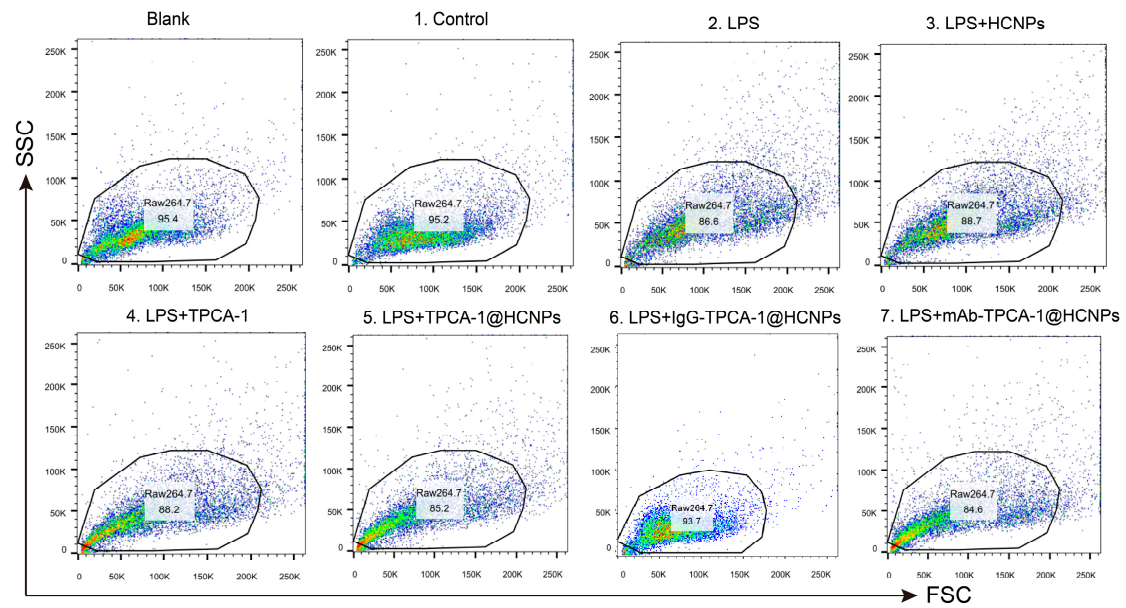

**Figure S6.** Gating strategy used for macrophage polarization experiment of RAW264.7 cells.

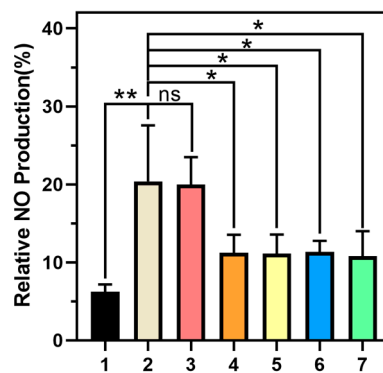

**Figure S7.** NO production of RAW264.7 cells treated with LPS (100 ng/mL), w/o or w/ TPCA-1, HCNPs, TPCA-1@HCNPs or mAb-TPCA-1@HCNPs at 0.02 µg/ml TPCA-1 for 24 h.

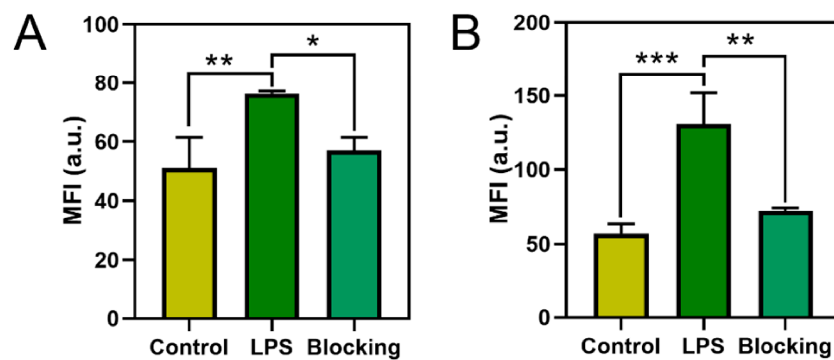

**Figure S8.** Fluorescence quantification of mAb-C6@HCNPs per unit area on macrophages (A) and endothelial cells (B).



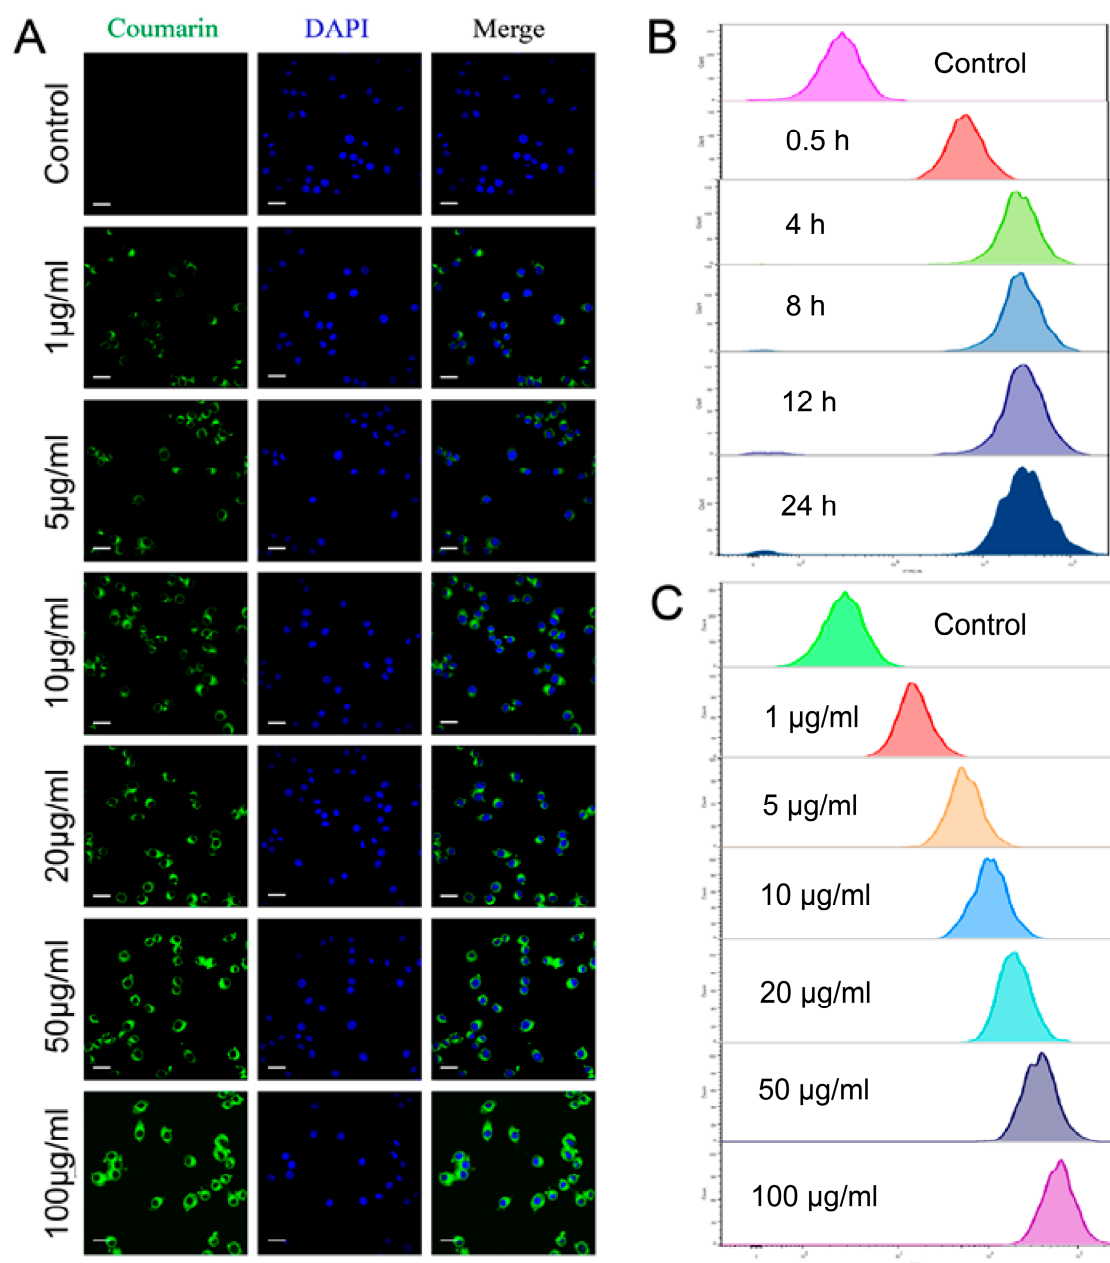

**Figure S9.** Confocal microscopy images of the concentration-dependent cellular uptake of mAb-C6@HCNPs. After activated RAW264.7 cells were incubated with mAb-C6@HCNPs (green) at various concentrations (A), nuclei were stained with DAPI (blue). Scale bar: 20  $\mu\text{m}$ . The corresponding quantitative analysis of time-dependent cellular uptake for mAb-C6@HCNPs by flow cytometry (B). Quantitative analysis of the concentration-dependent cellular uptake of mAb-C6@HCNPs by flow cytometry is also shown (C).

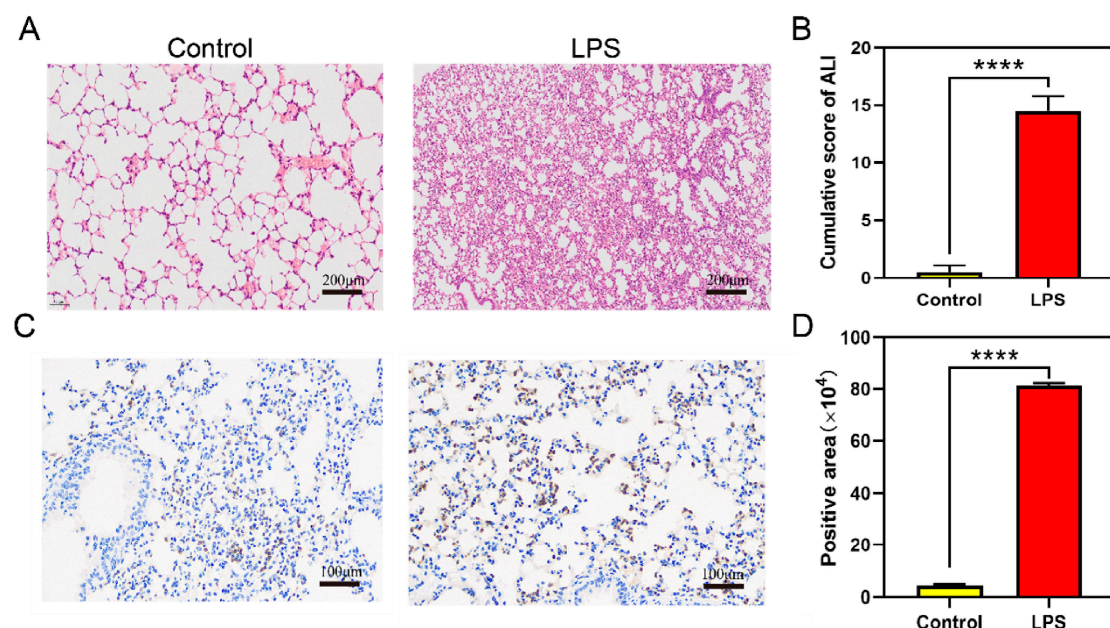

**Figure S10.** Establishment and validation of the mouse sepsis ALI model. Hematoxylin and eosin (H&E)-stained images of lung sections (A) and the cumulative ALI score are also shown (B). The scale bar is 200  $\mu$ m. MPO immunohistochemistry (IHC) of lung sections (C) and corresponding quantification results (D); the scale bar is 100  $\mu$ m.

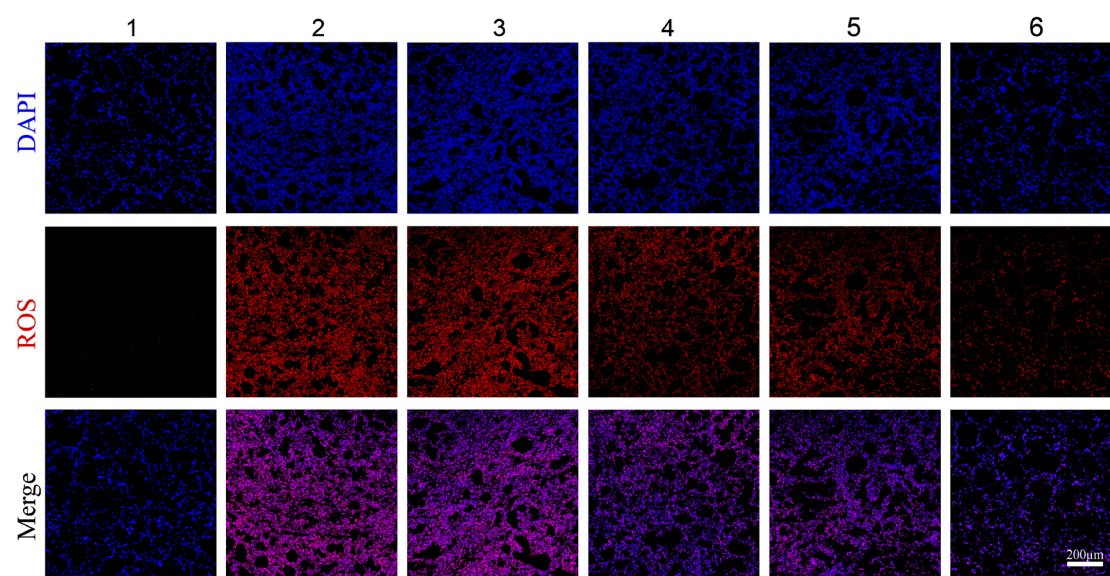

**Figure S11.** Representative fluorescence images visualizing ROS. DHE and DAPI staining of lung tissues (blue, nuclei; red, ROS). Groups 1-6 represent the control, LPS, LPS+HCNPs, LPS+TPCA-1, LPS+IgG-TPCA-1@HCNPs and LPS+mAb-TPCA-1@HCNPs groups respectively. Scale bars, 200  $\mu$ m.

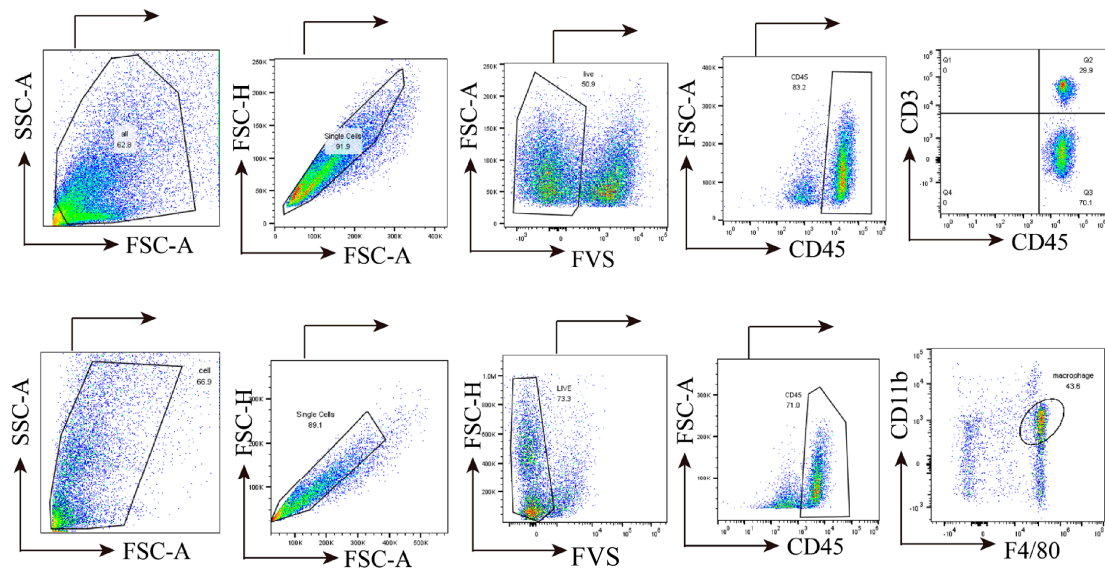

**Figure S12.** Gating strategy for flow cytometry analysis used to detect T cells (upper) and macrophages (lower).

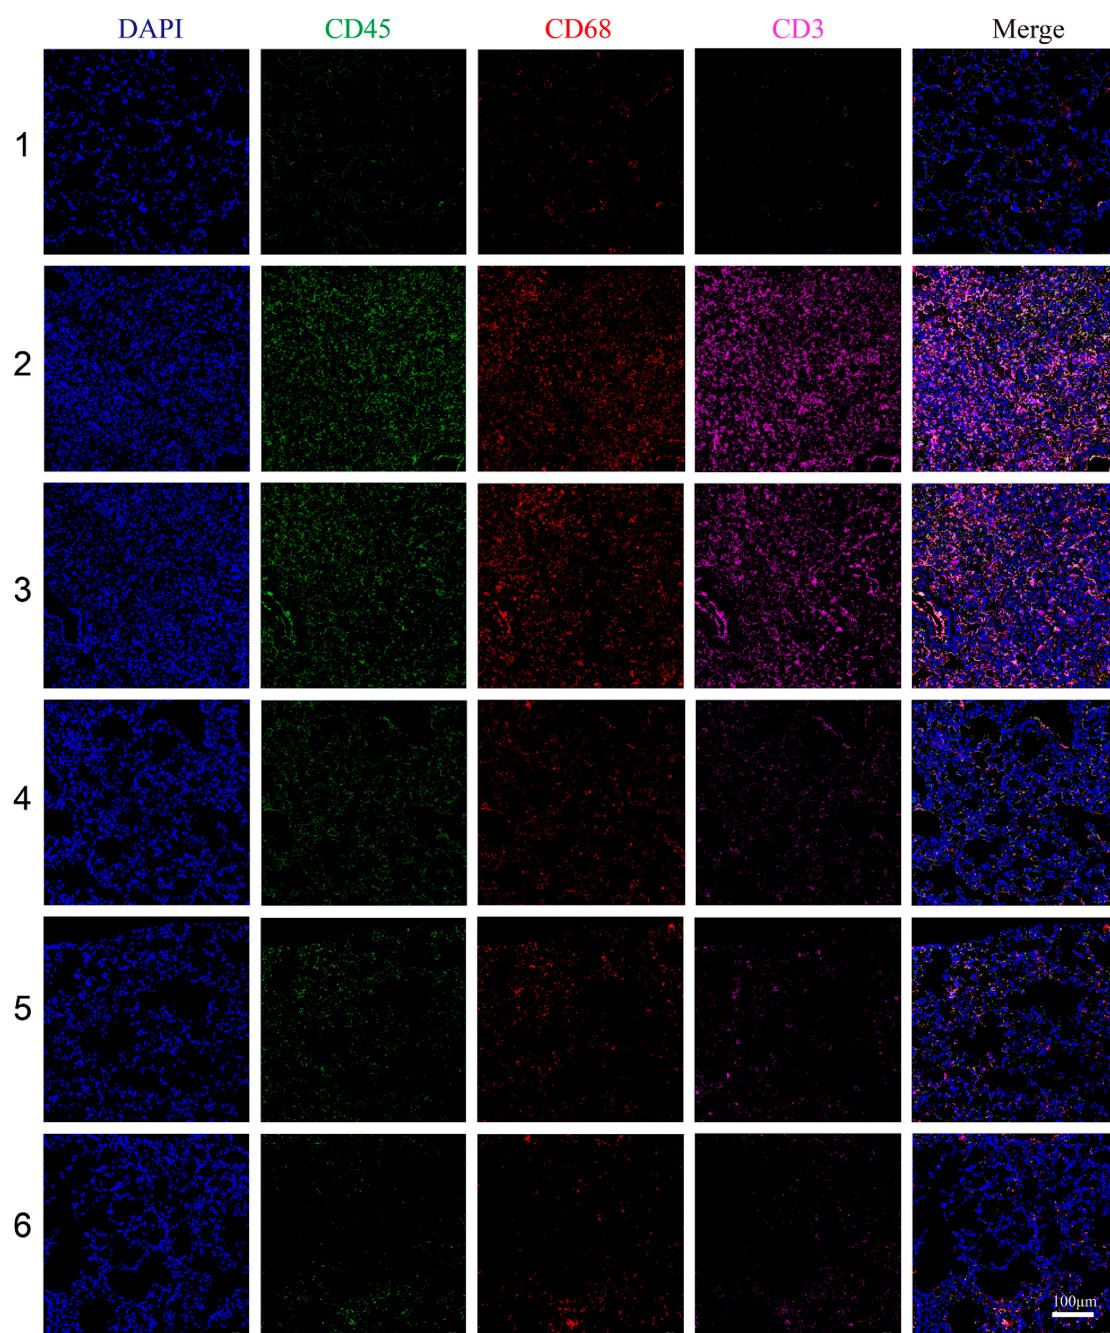

**Figure S13.** Representative immunofluorescence images of lung tissue sections in different groups as indicated (blue, nuclei; green, CD45; red, CD68; pink, CD3). Groups 1~6 represent the control, LPS, LPS+HCNPs, LPS+TPCA-1, LPS+IgG-TPCA-1@HCNPs and LPS+mAb-TPCA-1@HCNPs groups. Scale bars, 100  $\mu\text{m}$ .



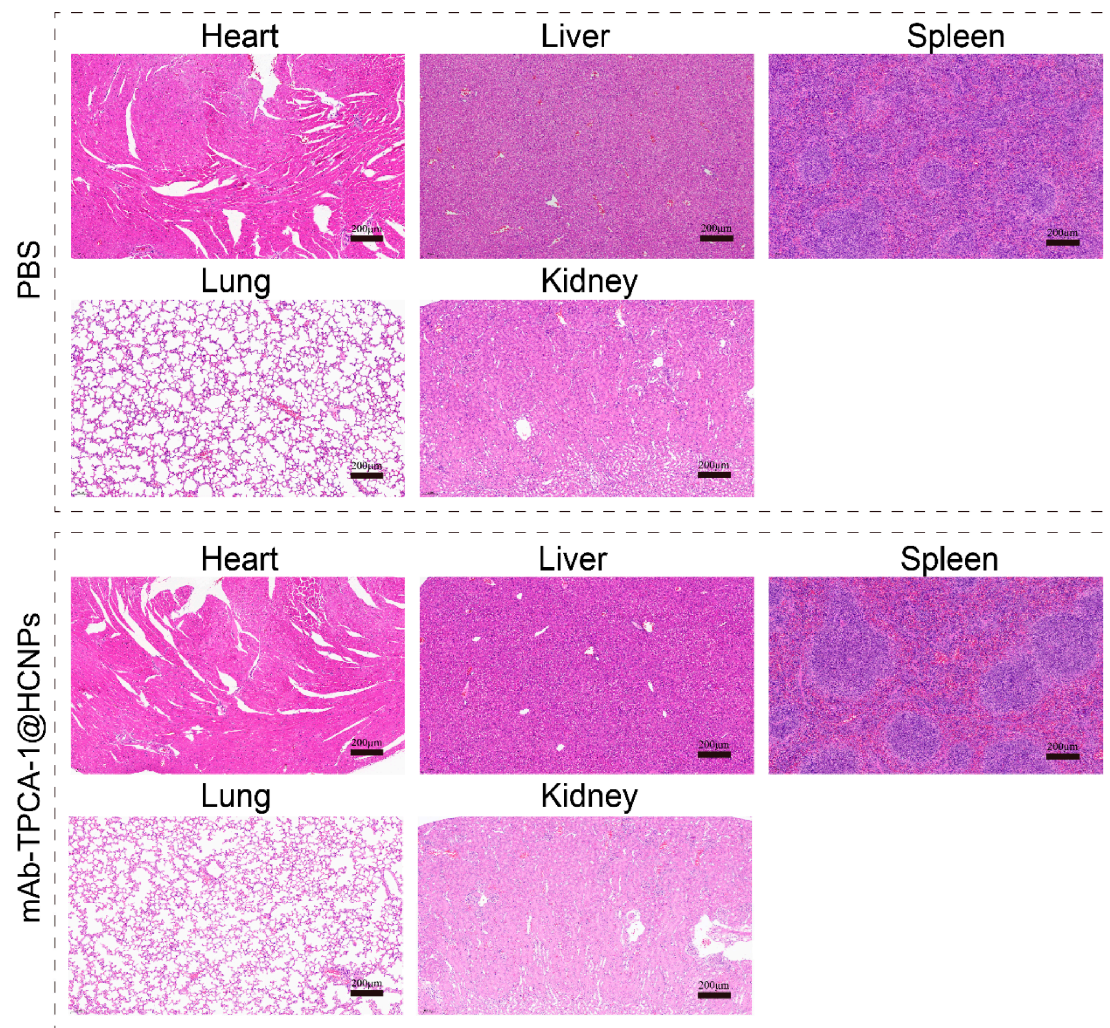

**Figure S14.** H&E staining of the heart, liver, spleen, lung, and kidney after 14 days of treatment with PBS and mAb-TPCA-1@HCNPs at a high dose of 100 mg/kg in healthy BALB/c mice. Scale bar is 200 μm.
